# Supplementary material for: An MCM family protein promotes interhomolog recombination by preventing precocious intersister repair of meiotic DSBs
Source: PubMed Central journal article supplement (PMC6922451; doi:10.1371/journal.pgen.1008514), 2019-12-09
Supplement: pgen.1008514.s004.pdf [file pgen.1008514.s004.pdf]

S2 Table. Mcmd1 and Pamd1 BLASTP searches

| Query Protein                  | Group                               | Species                          | Top hit (ID)                                                  | BLASTP E-value*                                                       |       |
|--------------------------------|-------------------------------------|----------------------------------|---------------------------------------------------------------|-----------------------------------------------------------------------|-------|
| <b>Mcmd1</b>                   | Multicellular animals               | <i>Homo sapiens</i>              | Mcm8 (sp Q9UJA3-4 MCM8_HUMAN)                                 | 0.024                                                                 |       |
|                                |                                     | <i>Mus musculus</i>              | Mcm8 (sp Q9CWV1 MCM8_MOUSE)                                   | 0.001                                                                 |       |
|                                |                                     | <i>Danio rerio</i>               | Mcm4 (ENSDARP00000097832)                                     | 2.64E-04                                                              |       |
|                                |                                     | <i>Drosophila melanogaster</i>   | Rec (FBpp0306662)                                             | 1.98E-05                                                              |       |
|                                |                                     | <i>Caenorhabditis elegans</i>    | Mcm4 (Y39G10AR.14a)                                           | 3.26E-06                                                              |       |
|                                | Land plants                         | <i>Arabidopsis thaliana</i>      | Mcm8 (AT3G09660.1)                                            | 0.61                                                                  |       |
|                                | Fungi                               | <i>Saccharomyces cerevisiae</i>  | Mcm4 (YPR019W)                                                | 2.22E-04                                                              |       |
|                                |                                     | <i>Schizosaccharomyces pombe</i> | Sre2 (SPBC354.05c.1:pep)                                      | 1.7                                                                   |       |
|                                | Protists                            | Tetrahymena                      | <i>Tetrahymena borealis</i>                                   | EI9_20942.1                                                           | 0     |
|                                |                                     |                                  | <i>Tetrahymena ellioti</i>                                    | EI7_15054.1                                                           | 0     |
|                                |                                     |                                  | <i>Tetrahymena malaccensis</i>                                | EIA_23651.1                                                           | 0     |
|                                |                                     | Other ciliates                   | <i>Paramecium tetraurelia</i>                                 | Mini-chromosome maintenance, DNA-dependent ATPase (GSPATP00012268001) | 1.2   |
|                                |                                     |                                  | <i>Ichthyophthirius multifiliis</i>                           | mcm2-3-5 family protein, putative (IMG5_106700)                       | 0.41  |
|                                |                                     |                                  | <i>Oxytricha trifallax</i>                                    | MCM8a (Contig7673.0.g5)                                               | 0.075 |
|                                |                                     |                                  | <i>Stylonychia lemnae</i>                                     | mcm family protein (Contig915.g1014)                                  | 0.054 |
|                                |                                     | Other protists                   | <i>Plasmodium falciparum</i>                                  | Mcm5 (PF3D7_1211700)                                                  | 2.9   |
|                                |                                     |                                  | <i>Toxoplasma gondii</i>                                      | Mcm5 (TGME49_243920)                                                  | 0.003 |
|                                |                                     |                                  | <i>Trypanosoma brucei</i>                                     | MCM complex subunit, putative (Tbg972.11.13060)                       | 0.14  |
|                                | <i>Giardia lamblia</i>              | Mcm5 (GL50581_282)               | 0.17                                                          |                                                                       |       |
|                                | <b>Pamd1</b>                        | Multicellular animals            | <i>Homo sapiens</i>                                           | Cilia And Flagella Associated Protein 53 (sp Q96M91 CFA53_HUMAN)      | 0.064 |
| <i>Mus musculus</i>            |                                     |                                  | N/A                                                           | N/A                                                                   |       |
| <i>Danio rerio</i>             |                                     |                                  | Radial spoke head 3 homolog (ENSDARP00000017411)              | 1                                                                     |       |
| <i>Drosophila melanogaster</i> |                                     |                                  | Mei218 (FBpp0292855)                                          | 0.16                                                                  |       |
| <i>Caenorhabditis elegans</i>  |                                     |                                  | T23F2.2b                                                      | 4.8                                                                   |       |
| Land plants                    |                                     | <i>Arabidopsis thaliana</i>      | N/A                                                           | N/A                                                                   |       |
| Fungi                          |                                     | <i>Saccharomyces cerevisiae</i>  | YAP5 (YIR018W)                                                | 1.4                                                                   |       |
|                                |                                     | <i>Schizosaccharomyces pombe</i> | Cell polarity protein alp21 (SPAC22H10.10.1:pep)              | 1.7                                                                   |       |
| Protists                       |                                     | Tetrahymena                      | <i>Tetrahymena borealis</i>                                   | EI9_18594.1                                                           | 0     |
|                                |                                     |                                  | <i>Tetrahymena ellioti</i>                                    | EI7_16247.1                                                           | 0     |
|                                |                                     |                                  | <i>Tetrahymena malaccensis</i>                                | EIA_22197.1                                                           | 0     |
|                                |                                     | Other ciliates                   | <i>Paramecium tetraurelia</i>                                 | Protein kinase-like domain (GSPATP00021108001)                        | 5.6   |
|                                |                                     |                                  | <i>Ichthyophthirius multifiliis</i>                           | Hypothetical protein (IMG5_120920)                                    | 1.1   |
|                                |                                     |                                  | <i>Oxytricha trifallax</i>                                    | GCC2 and GCC3 (Contig473.1.g50)                                       | 0.057 |
|                                |                                     |                                  | <i>Stylonychia lemnae</i>                                     | Eukaryotic translation initiation factor 4e type 2 (Contig160.g191)   | 0.64  |
|                                | Other protists                      | <i>Plasmodium falciparum</i>     | DEAD box ATP-dependent RNA helicase, putative (PF3D7_0411400) | 0.86                                                                  |       |
|                                |                                     | <i>Toxoplasma gondii</i>         | Phospholipase, patatin family protein (TGME49_231370)         | 8.3                                                                   |       |
|                                |                                     | <i>Trypanosoma brucei</i>        | Hypothetical protein, conserved (Tbg972.8.460)                | 3.2                                                                   |       |
| <i>Giardia lamblia</i>         | Hypothetical protein (GL50581_1233) | 0.95                             |                                                               |                                                                       |       |

\*BLASTP E-value threshold was set to 10 (default). Homologs with an E-value equal to or lower than 0.001 (1e-3) are colored in blue.
