# Supplementary material for: An MCM family protein promotes interhomolog recombination by preventing precocious intersister repair of meiotic DSBs
Source: PubMed Central journal article supplement (PMC6922451; doi:10.1371/journal.pgen.1008514), 2019-12-09
Supplement: pgen.1008514.s005.pdf [file pgen.1008514.s005.pdf]

S3 Table. Key resources

| Primer ID | Primer full name     | Purpose                                                 | Primer sequence (5' -> 3', adapter sequence used for ligation) |
|-----------|----------------------|---------------------------------------------------------|----------------------------------------------------------------|
| #1        | Mcnd1_5UTRf162_NotI  | <i>MCMD1</i> somatic gene knockout                      | AGTTCTAGAGCGGCCG ATCTTGCTTTATCAATCATTATTG                      |
| #2        | Mcnd1_5UTRr1061_N4   |                                                         | GTCAGGTGCGTGGTACCC TTGCTAACTTAGACAGAAATTCAG                    |
| #3        | Mcnd1_3UTRf3866_N4   |                                                         | CTGACGTGCGACCATCCC GTGAAATAAACTTCTATTACCAAG                    |
| #4        | Mcnd1_3UTRr4591_Not1 |                                                         | ACCGCGTGGCGGCCG TCTAAGTCAAGTCTTTCTCTAC                         |
| #5        | 891_5'fl FW          | <i>PAMD1</i> somatic gene knockout                      | ctcgagtttttcagcaagat GGCTTGCTTGAATGAATG                        |
| #6        | 891_5'fl RV          |                                                         | cctgcagccc CTAATTTGAATCGACTTCTATAAGTTAC                        |
| #7        | 891_3'fl FW          |                                                         | aatgcagccc CTCCATCTCCTTCTTCTAAAAAATTTT                         |
| #8        | 891_3'fl RV          |                                                         | aggagatcttctagaagat GTGCTTTTATAGATCAATATTGTTG                  |
| #9        | 891_NEO4_Kaz_Fwd     |                                                         | ttcaaattag GGGCTGCAGGAATTCGATA                                 |
| #10       | 891_NEO4_Kaz_Rev     |                                                         | ggagatggag GGGCTGCATTTTCCAGTAAAAATTTG                          |
| #11       | pJet_Fwd             |                                                         | ATCTTTCTAGAAGATCTCCTAC                                         |
| #12       | pJet_Rev             |                                                         | ATCTTGCTGAAAACTCGAG                                            |
| #13       | Mcnd1_cdsf3099_SacG  | Mcnd1 C-terminal HA tagging                             | ACTAAGGGAACAAAAGCTGGAGCTC ATTTCTTAAATAAGTTCCAAC                |
| #14       | Mcnd1_cdsr3840_BamHI |                                                         | TCTTCACCCCTTAGAAACCTGGATCC TAGCTTATCTAAGTTAAGCTAA              |
| #15       | Mcnd1_3UTRf3866_XhoI |                                                         | GCTTATCGATACCGTCGACCTCGAG GTGAAATAAACTTCTATTACCA               |
| #16       | Mcnd1_3UTRr4591_KpnI |                                                         | CTCACTATAGGGCGAATTGGGTACC TCTAAGTCAAGTCTTTCTCTAC               |
| #17       | Chx_fw               |                                                         | TCCAGATCCCCGGGCTGCAG taccagcacctgacgg                          |
| #18       | Chx_rv               |                                                         | AGTTTATTTTACCTCGAGGTGCAG atggtgacgctcagtttttcc                 |
| #19       | Mcdp_CDSf2863_SacG   | Pamd1 C-terminal HA tagging                             | ACTAAGGGAACAAAAGCTGGAGCTC TCAGTATTGCTTTAAAGGATTA               |
| #20       | Mcdp_CDSr3578_BamG   |                                                         | TCTTCACCCCTTAGAAACCTGGATCC AAATCTTATAAAATCTAAAATCT             |
| #21       | Mcdp_3UTRf3607_XhoG  |                                                         | GCTTATCGATACCGTCGACCTCGAG TAAGTTACTCAAAGATAAAACAGT             |
| #22       | Mcdp_3UTRr4321_KpnG  |                                                         | CTCACTATAGGGCGAATTGGGTACC TGCTTGAATGAATGAAGTAGG                |
| #23       | Mcnd1_KOckf3197      | <i>MCMD1</i> knockout validation                        | ATCTGAATTAGTGCCTTAAGC                                          |
| #24       | Mcnd1_KOckr3628      |                                                         | TAATTTTTCTACCTGTTACTTCTTC                                      |
| #25       | Pamd1_KOckf3363      | <i>PAMD1</i> knockout validation                        | ATTTTGTAGAGATTTAGACACAAAAG                                     |
| #26       | Pamd1_KOckr3563      |                                                         | TAAAATCTAATCTTAAATCTTCTCC                                      |
| #27       | Hop2_Cdsqf2194       | <i>HOP2</i> knockout validation                         | ATGAAAATACTGATGAAAGTGATAG                                      |
| #28       | Hop2_Cdsqf2553       |                                                         | TTTAAGTTACTTTCAAGAGTAGTTG                                      |
| #29       | Twi1_CDSf3018        | <i>TWI1</i> RT-PCR                                      | TTTAGCAAGTTTATGAATAAGCTC                                       |
| #30       | Twi1_CDSr3574        |                                                         | TAATAGTGTAGTGAAGTAGGAGAAGC                                     |
| #31       | 7610 5' coDel        | <i>MCMD1</i> somatic gene knockout by using co-Deletion | CTTTATGTTATCATCTTATGACCCG gggtagctagaagagttc                   |
| #32       | 7610 3' coDel        |                                                         | CTCATCAAGTTGTAATGCTAAAATGCctgtctaagtaggaagc                    |

| Plasmids           | Note                | Source                                     |
|--------------------|---------------------|--------------------------------------------|
| pChx_Smal          |                     | Gao et al. Genes&Dev, 2013                 |
| pBluescript SK (-) | GenBank: X52324.1   | Stratagene                                 |
| pMcoDel            |                     | Noto et al. Mol Cell, 2015                 |
| pSGS1 RNAi         |                     | Lukaszewicz et al. Nucleic Acids Res, 2013 |
| pNeo4              | GenBank: EU606202.1 | Mochizuki. Gene, 2008                      |
| pBluescript SK (+) | GenBank: X52325.1   | Stratagene                                 |
| pHA-neo4           | GenBank: AB570108   | Kataoka et al. Gene, 2010                  |
| pEGFP-neo4         | GenBank: AB570109   | Kataoka et al. Gene, 2010                  |
| pJET1.2 blunt      |                     | Thermo Fisher (Fermentas)                  |

  

| <i>T. thermophila</i> strains | Note                       | Source                                       |
|-------------------------------|----------------------------|----------------------------------------------|
| B2086 II                      | Wild-type; Mating type II  | Tetrahymena Stock Center; Strain ID: SD01625 |
| CU428.2                       | Wild-type; Mating type IIV | Tetrahymena Stock Center; Strain ID: SD00178 |
| hop2Δ B2086                   |                            | Mochizuki. Gene, 2008                        |
