# Supplementary material for: An MCM family protein promotes interhomolog recombination by preventing precocious intersister repair of meiotic DSBs
Source: PubMed Central journal article supplement (PMC6922451; doi:10.1371/journal.pgen.1008514), 2019-12-09

S3 Fig

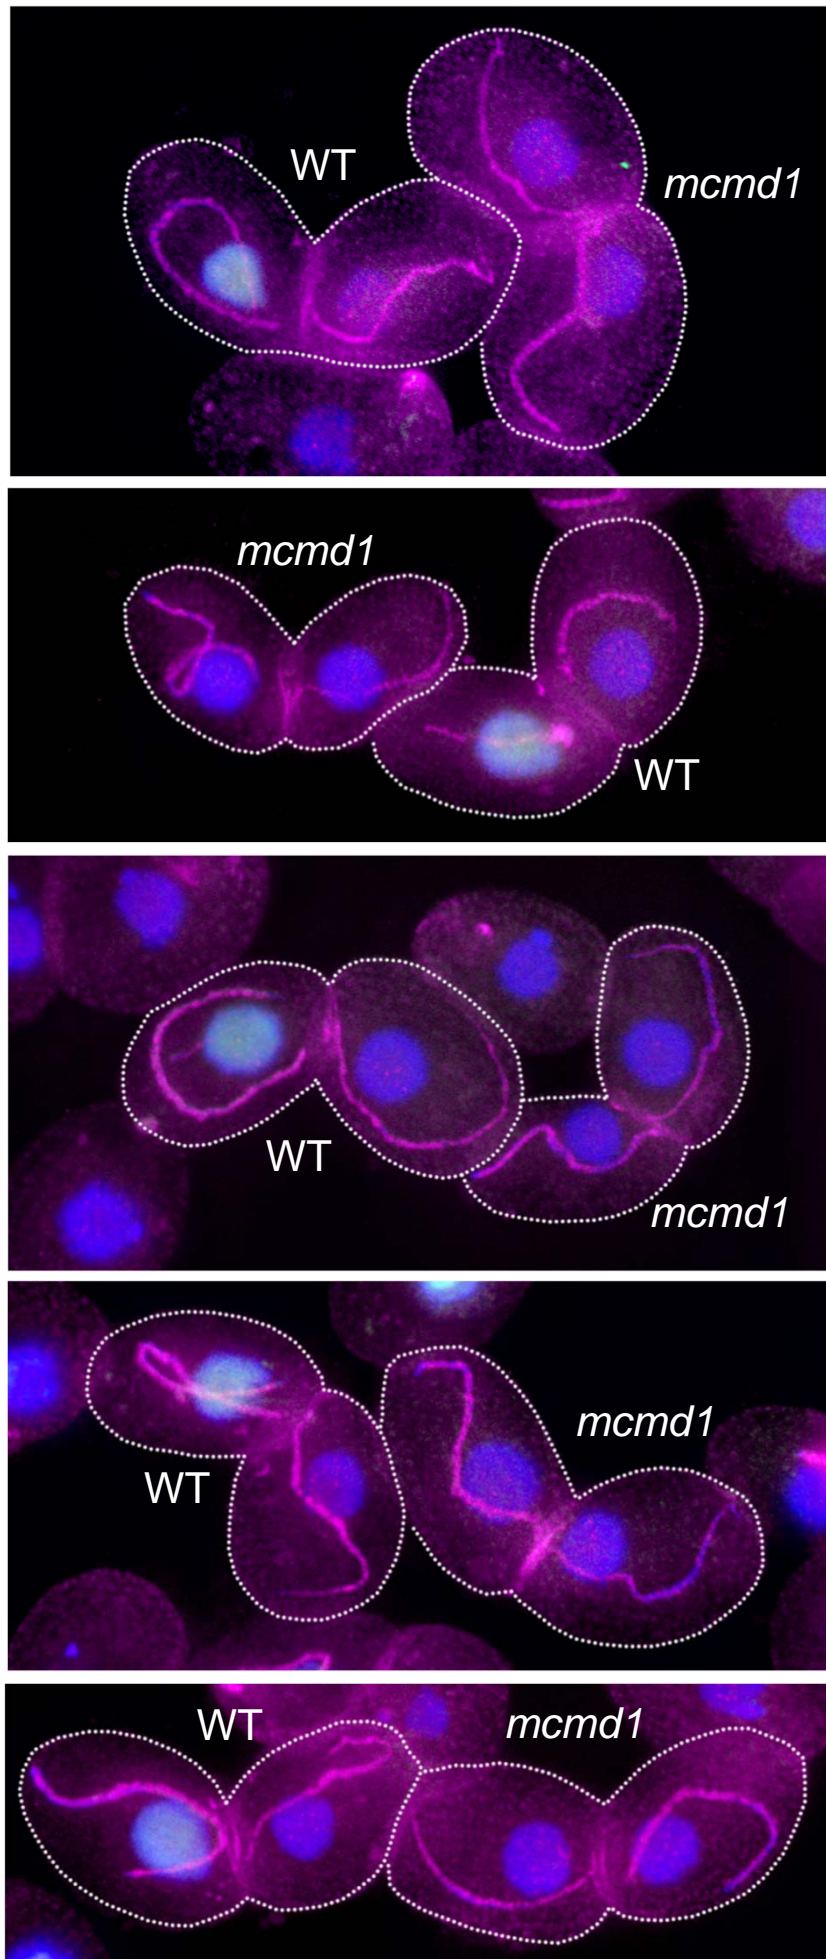

Supplement: pgen.1008514.s008.pdf [file pgen.1008514.s008.pdf]
